# Supplementary material for: Binuclear Ru–Ru and Ir–Ru complexes for deep red emission and photocatalytic water reduction
Source: Royal Society of Chemistry journal article supplement (doi:10.1039/c7ta00508c), 2017-01-01
Supplement: c7ta00508c1.pdf [file c7ta00508c1.pdf]

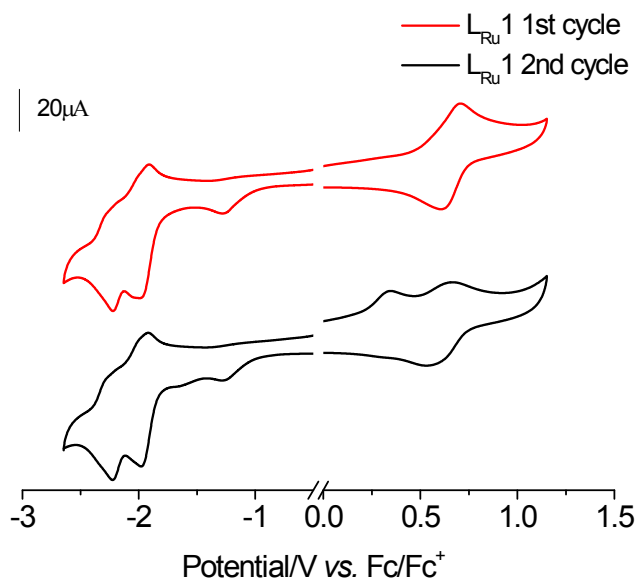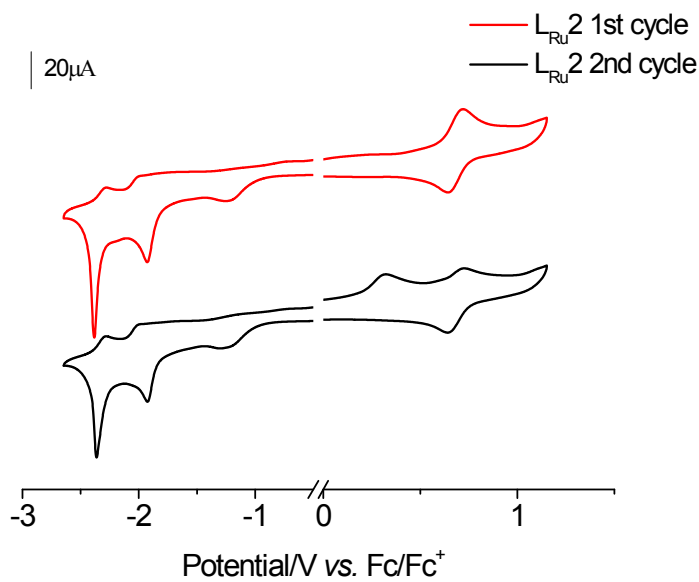

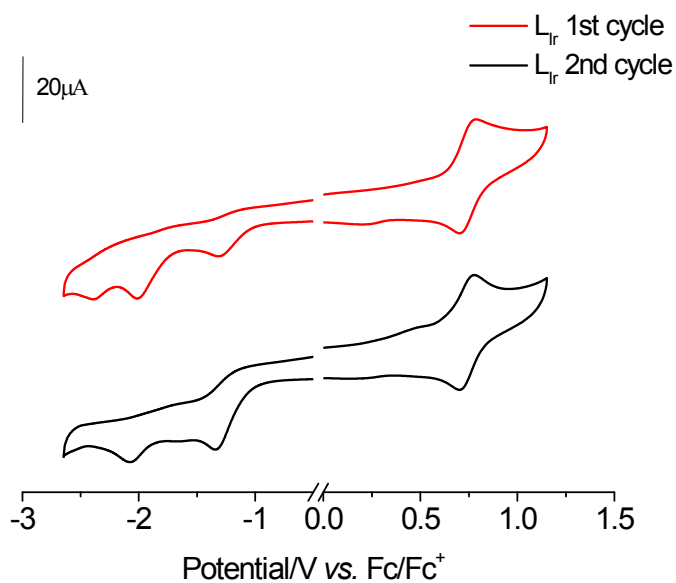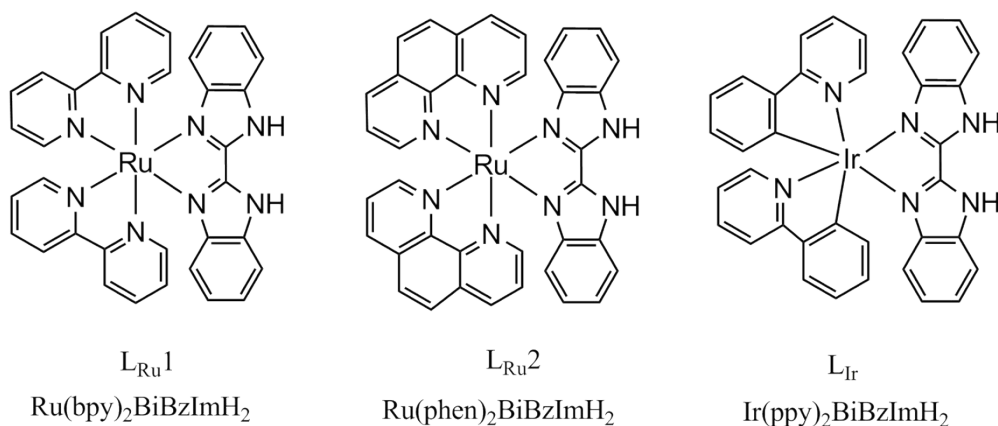

|           | $E_{1/2}(ox) / V \text{ vs. } Fc/Fc^+$  | $E_p(red) / V \text{ vs. } Fc/Fc^+$                              |
|-----------|-----------------------------------------|------------------------------------------------------------------|
| Ru2(1)    | 0.307, 0.600                            | -1.949 <sup>b</sup> , -2.248 <sup>b</sup>                        |
| Ru2(2)    | 0.302, 0.597                            | -1.958, -2.28, -2.492                                            |
| RuIr(1)   | 0.321, 0.676                            | -1.951 <sup>b</sup> , -2.215 <sup>b</sup>                        |
| RuIr(2)   | 0.300, 0.532                            | -1.934, -2.060, -2.310, -2.490                                   |
| $L_{Ru1}$ | 0.654 (2nd: 0.346 <sup>a</sup> , 0.594) | -1.952 <sup>b</sup> , -2.224 (2nd: -1.951 <sup>b</sup> , -2.232) |
| $L_{Ru2}$ | 0.680 (2nd: 0.318 <sup>a</sup> , 0.685) | -1.932, -2.238 (2nd: -1.928, -2.364)                             |
| $L_{Ir}$  | 0.742 (2nd: 0.738)                      | -2.014, -2.394 (2nd: -2.082)                                     |

a:  $E_p(ox)$ , b:  $E_{1/2}(red)$ .

Fig. S1 CV curves and structures of mononuclear Ru(II)/Ir(III) compounds (DMF,  $1 \times 10^{-5} \text{ mol L}^{-1}$ ), and detailed redox potentials of the binuclear and mononuclear compounds.

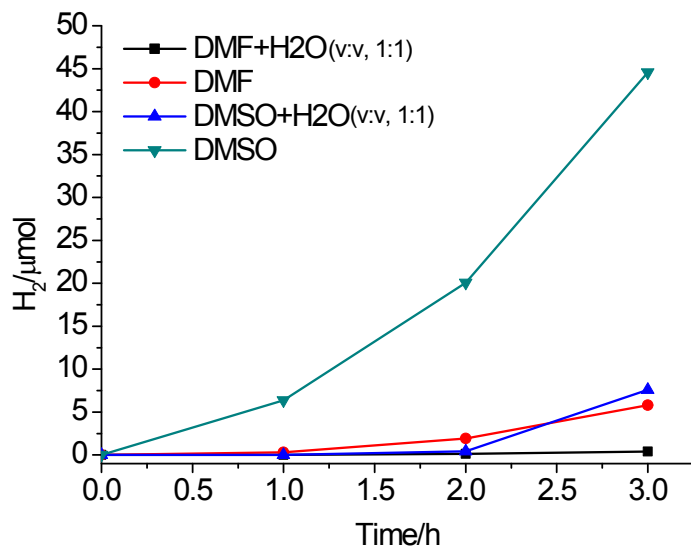

a)

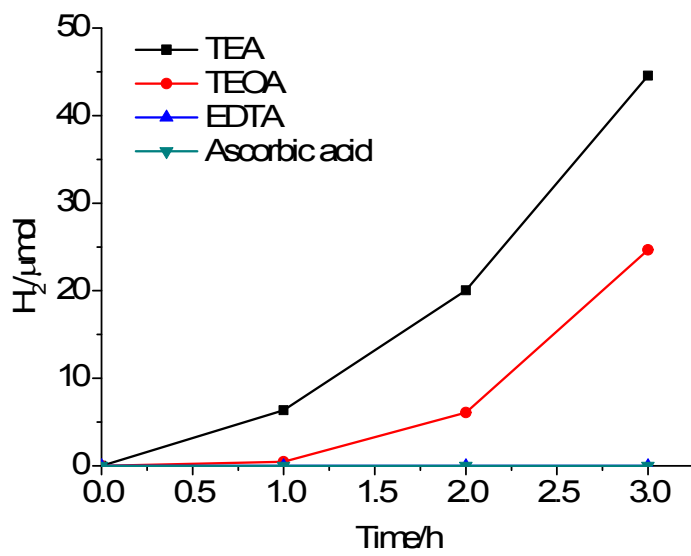

b)

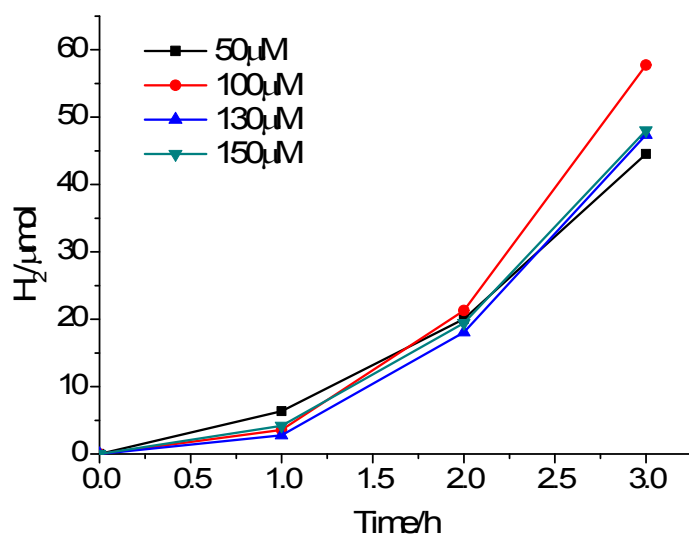

c)

Fig. S2 Photocatalytic H<sub>2</sub> production results of IrRu(1) as PS under different conditions, (a) different solvents (PS, 50 μM; WRC, 1mg; SR, TEA, 0.72 M), (b) different SRs (PS, 50 μM; WRC, 1mg; solvent, DMSO), (c) different concentrations of PS (WRC, 1mg; SR, TEA, 0.72 M; solvent, DMSO).

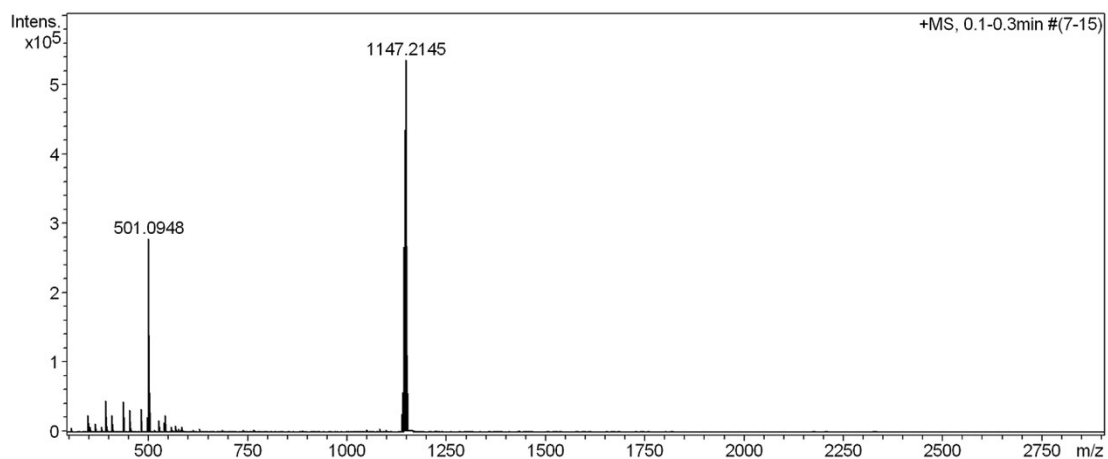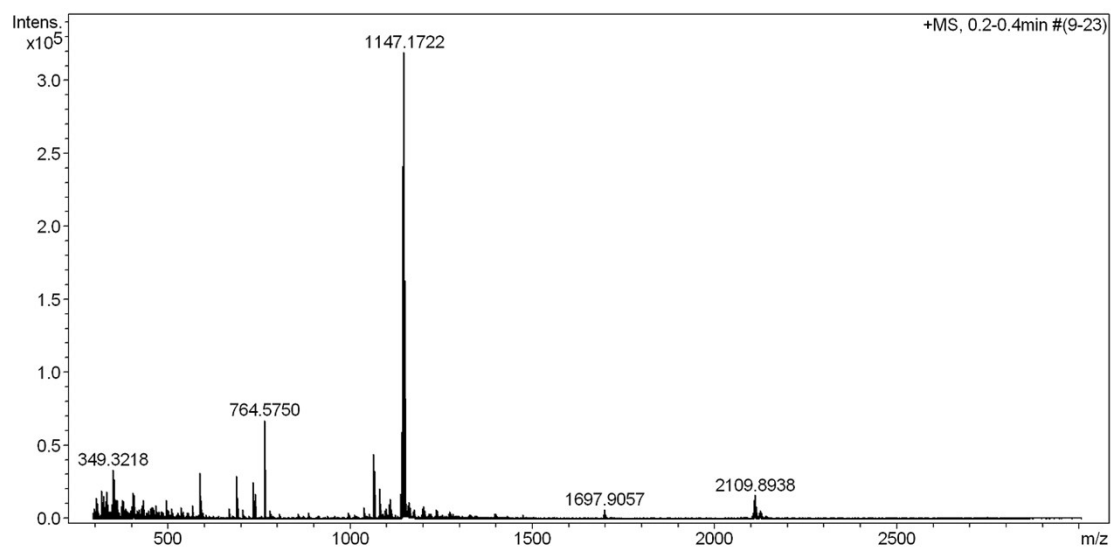

Fig. S3 MS spectra of the photocatalytic system containing IrRu(1) as photosensitizers, showing the persistence of IrRu(1) component in the solution before (top) and after (bottom) photocatalytic process.
